# Supplementary material for: Characterization and Structure–Property Relationships of Organic–Inorganic Hybrid Composites Based on Aluminum–Magnesium Hydroxycarbonate and Azo Chromophore
Source: PubMed Central journal article supplement (PMC6429098; doi:10.3390/molecules24050880), 2019-03-01
Supplement: molecules-24-00880-s001.pdf [file molecules-24-00880-s001.pdf]

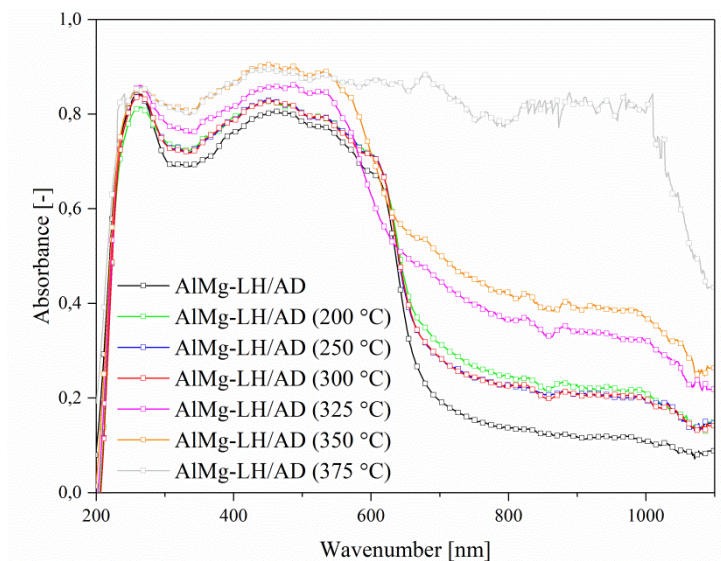

**Figure S1.** UV-VIS spectra of hybrid pigment (AlMg-LH/AD 10%) exposed to different temperatures.

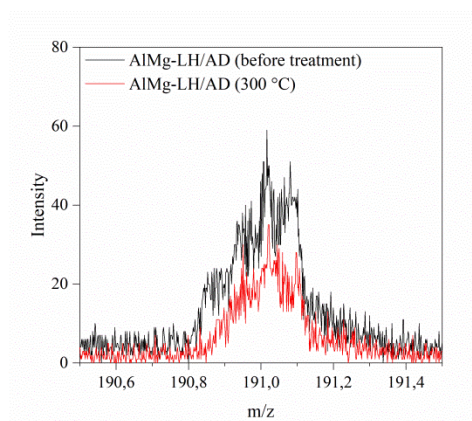

**Figure S2.** TOF-SIMS spectra of the  $C_{18}H_{10}O_5N_2Mg^{2+}$  ion from the AlMg-LH/AD 10% sample before and after heating at 300 °C.

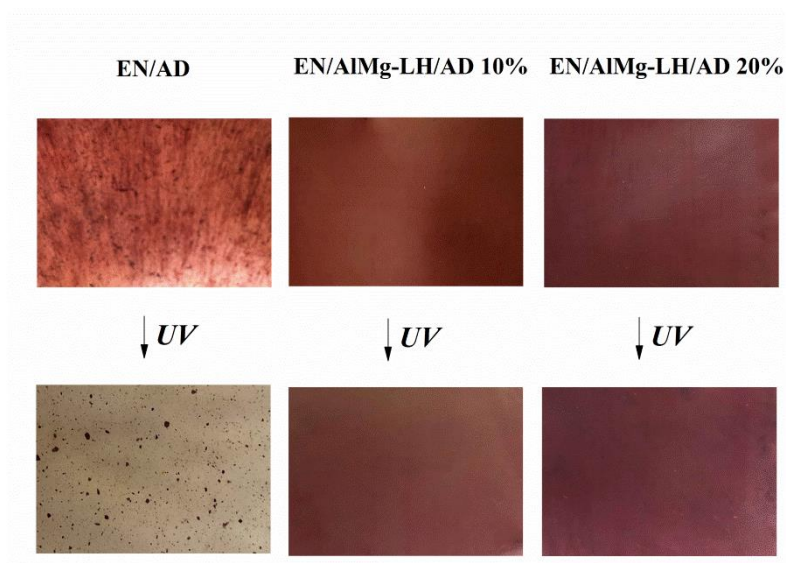

**Figure S3.** Digital photographs of ethylene–norbornene (E–N) composites: E–N, E–N/AlMg–LH/AD 10% and AlMg–LH/AD 20% before and after 500 h of UV aging.

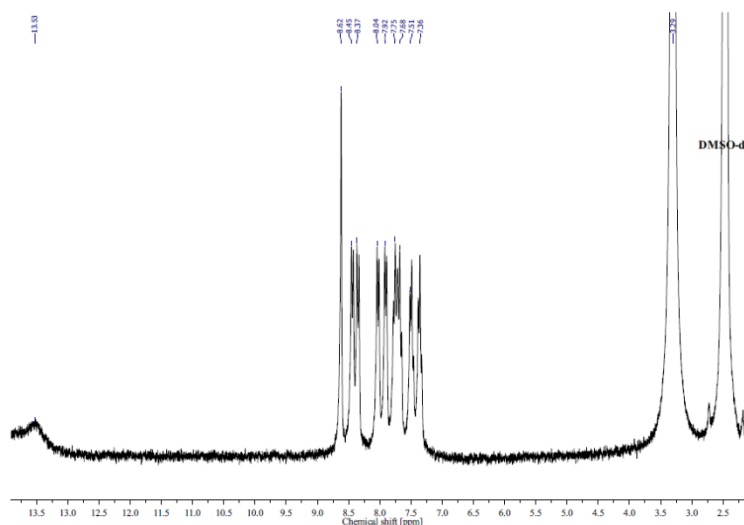

**Figure S4.**  $^1\text{H}$  NMR spectrum of AD dye.

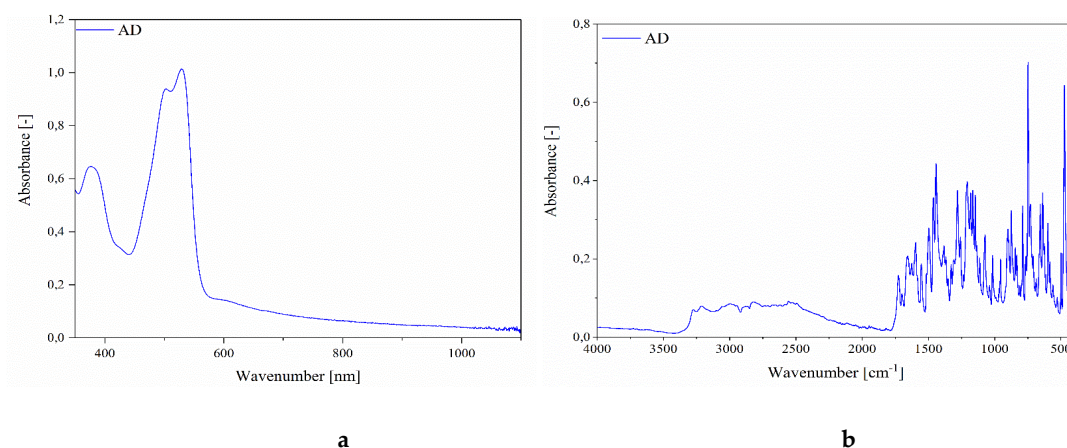

**Figure S5.** Absorption spectra of AD dye in chloroform ( $c = 1 \times 10^{-4} \text{ M}$ ) (a), and FT-IR spectra of AD dye (b).

**Table S1.** Color parameters of AD dye and hybrid pigment AlMg–LH/AD 20% during temperature treatment.

| Sample              | $L^{*1}$ | $a^{*2}$ | $b^{*3}$ |
|---------------------|----------|----------|----------|
| AD                  | 38.18    | 18.92    | 14.75    |
| AD (150 °C)         | 38.02    | 21.06    | 15.12    |
| AD (200 °C)         | 33.04    | 2.70     | 0.11     |
| AD (250 °C)         | 33.25    | 1.48     | -0.11    |
| AlMg–LH             | 43.66    | 7.18     | 30.59    |
| AlMg–LH/AD (150 °C) | 42.31    | 8.02     | 30.14    |
| AlMg–LH/AD (200 °C) | 41.02    | 8.41     | 28.23    |
| AlMg–LH/AD (250 °C) | 40.30    | 11.47    | 26.70    |

<sup>1</sup>  $L^*$ —lightness, <sup>2</sup> $a^*$ —negative values for green and positive values for red, <sup>3</sup> $b^*$ —negative values for blue and positive values for yellow.

**Table S2.** Elemental composition of the hybrid pigments.

| <b>Hybrid Pigment</b> | <b>%C*</b>   | <b>%H*</b> | <b>%N*</b> | <b>%N**</b> |
|-----------------------|--------------|------------|------------|-------------|
| AlMg-LH               | 1.64; 1.54   | 3.19; 3.20 | -          |             |
| AlMg-LH/AD 10%        | 7.18; 7.32   | 3.17; 3.20 | 0.84; 0.79 | 0.84        |
| AlMg-LH/AD 20%        | 12.39; 12.23 | 3.29; 3.32 | 1.58; 1.59 | 1.67        |

\*received, \*\*expected.
